# Supplementary material for: Gene Expression Profiling in Behcet's Disease Indicates an Autoimmune Component in the Pathogenesis of the Disease and Opens New Avenues for Targeted Therapy
Source: J Immunol Res. 2018 Apr 24;2018:4246965. doi: 10.1155/2018/4246965 (PMC5941805; doi:10.1155/2018/4246965)
Supplement: Supplementary 2 — Supplementary Figure 1: PPI network of modulated genes in BD PBCs. [file 4246965.f2.xls]

## Sheet: Foglio1
Supplementary table 1. Annotated genes differentially expressed in BD PBC versus healthy controls grouped according to their function
Probe Set ID	Gene Title	Gene Symbol	FC	p value	Representative Public ID
Apoptosis
M97935_5_at	signal transducer and activator of transcription 1, 91kDa	STAT1	2.25763	0.000860969	GU211347
200796_s_at	myeloid cell leukemia sequence 1 (BCL2-related)	MCL1	8.01935	<0.001	AF118124
200664_s_at	DnaJ (Hsp40) homolog, subfamily B, member 1	DNAJB1/HSP40	2.19551	0.010393	NM_006145
208536_s_at	BCL2-like 11 (apoptosis facilitator)	BCL2L11	2.38049	0.00120616	NM_006538
213606_s_at	Rho GDP dissociation inhibitor (GDI) alpha	ARHGDIA	2.29689	<0.001	NM_001185077
219228_at	zinc finger protein 331	ZNF331/RITA	2.5034	0.00381943	NM_018555
209722_s_at	serpin peptidase inhibitor, clade B (ovalbumin), member 9	SERPINB9	2.03336	0.00105679	NM_004155
201631_s_at	immediate early response 3	IER3	2.85382	0.00105679	NM_003897
201367_s_at	ZFP36 ring finger protein-like 2	ZFP36L2	9.06809	<0.001	NM_006887
Cell proliferation
203819_s_at	insulin-like growth factor 2 mRNA binding protein 3	IGF2BP3/IMP3	-2.70874	0.00499317	NM_006547
X00351_5_at	actin, beta	ACTB/GRIM19	2.25759	<0.001	NM_001101
201235_s_at	BTG family, member 2	BTG2	4.53117	<0.001	U72649
212332_at	retinoblastoma-like 2 (p130)	RBL2/p130	2.1102	0.00628022	NM_005611
205767_at	epiregulin	EREG	3.51116	0.0132569	NM_001432
205594_at	zinc finger protein 652	ZNF652	-2.14165	<0.001	NM_014897
219235_s_at	phosphatase and actin regulator 4	PHACTR4	-2.28257	<0.001	NM_023923
214052_x_at	proline-rich coiled-coil 2C	PRRC2C/XTP2	3.10574	<0.001	NM_015172
217494_s_at	phosphatase and tensin homolog pseudogene 1	PTENP1	3.10679	0.000716956	AF040103
208701_at	amyloid beta (A4) precursor-like protein 2	APLP2	2.63766	<0.001	NM_001642
Immune response
204794_at	dual specificity phosphatase 2	DUSP2	2.12119	0.00105679	NM_004418
209722_s_at	serpin peptidase inhibitor, clade B (ovalbumin), member 9	SERPINB9	2.03336	0.00105679	NM_004155
216248_s_at	nuclear receptor subfamily 4, group A, member 2	NR4A2	5.53943	0.012	NM_006186
205033_s_at	defensin, alpha 1	DEFA1	3.79639	0.007	NM_004084
204440_at	CD83 molecule	CD83	3.46936	0.015	NM_004233
213810_s_at	akirin 2	AKIRIN2	3.11739	<0.001	NM_018064
221239_s_at	Fc receptor-like 2	FCRL2	-2.36059	0.001	NM_030764
201278_at	Dab, mitogen-responsive phosphoprotein, homolog 2	DAB2	-2.17297	0.006	NM_032552
202340_x_at	nuclear receptor subfamily 4, group A, member 1	NR4A1	2	0.011	NM_002135
216915_s_at	protein tyrosine phosphatase, non-receptor type 12	PTPN12	2	0.003	S69182
205468_s_at	interferon regulatory factor 5	IRF5	2.01	<0.001	EF064718
221491_x_at	major histocompatibility complex, class II, DR beta 1	HLA-DRB1	2.1889	<0.001	U65585
211861_x_at	CD28 molecule	CD28	2	0.0139768	AF222343
203547_at	CD4 molecule	CD4	2.02	0.0159664	BT019811
213494_s_at	YY1 transcription factor	YY1	2	0.00611594	NM_003403
211027_s_at	inhibitor of kappa light polypeptide gene enhancer in B-cells, kinase beta	IKBKB/IKKb	2.33012	<0.001	AY663108
212595_s_at	DAZ associated protein 2	DAZAP2	2.55551	0.000524013	AY430097
208721_s_at	anaphase promoting complex subunit 5	ANAPC5	3.29449	<0.001	BF967271
M97935_5_at	signal transducer and activator of transcription 1, 91kDa	STAT1	2.25763	0.000860969	GU211347
217199_s_at	signal transducer and activator of transcription 2, 113kDa	STAT2	2.02	0.00166048	S81491
217502_at	interferon-induced protein with tetratricopeptide repeats 2	IFIT2	2	<0.001	NM_001547
201211_s_at	DEAD (Asp-Glu-Ala-Asp) box polypeptide 3, X-linked	DDX3X	2.24535	<0.001	NM_001356
211307_s_at	Fc fragment of IgA, receptor for	FCAR/CD89	5.03575	0.0041233	U43677
211272_s_at	diacylglycerol kinase, alpha 80kDa	DGKA	3.97606	0.0019882	AF064771
217738_at	nicotinamide phosphoribosyltransferase	NAMPT/PBEF	2.64157	0.00788502	NM_005746
206035_at	v-rel reticuloendotheliosis viral oncogene homolog (avian)	REL	2.56457	0.00451416	NM_002908
212079_s_at	lysine (K)-specific methyltransferase 2A	KMT2A/MLL1	2.56907	0.0040256	NM_001197104
205449_at	SAC3 domain containing 1	SAC3D1/SHD1	-2.18441	0.00337561	NM_013299
207001_x_at	TSC22 domain family, member 3	TSC22D3/GILZ	2.37524	0.0134932	NM_004089
209967_s_at	cAMP responsive element modulator	CREM	2.39948	0.00339924	D14826
212105_s_at	DEAH (Asp-Glu-Ala-His) box helicase 9	DHX9	3.81676	<0.001	NM_001357
217230_at	ezrin	EZR	2.68344	<0.001	AF199015
216901_s_at	IKAROS family zinc finger 1 (Ikaros)	IKZF1/IKAROS	6.08204	<0.001	NM_006060
221092_at	IKAROS family zinc finger 3 (Aiolos)	IKZF3/AIOLOS	3.11124	0.00603005	NM_012481
204896_s_at	prostaglandin E receptor 4 (subtype EP4)	PTGER4/EP4	2.66165	<0.001	NM_000958
221705_s_at	suppressor of IKBKE 1	SIKE1	2.37898	0.00453509	NM_001102396
206360_s_at	suppressor of cytokine signaling 3	SOCS3	2.012	0.00141883	NM_003955
204863_s_at	interleukin 6 signal transducer (gp130, oncostatin M receptor)	IL6ST	4.43531	0.00450624	AB102799
211192_s_at	CD84 molecule	CD84	2.32437	0.00177623	AF054818
215933_s_at	hematopoietically expressed homeobox	HHEX	-2.38429	<0.001	Z21533
212249_at	phosphoinositide-3-kinase, regulatory subunit 1 (alpha)	PIK3R1	3.19046	<0.001	JX133164
201694_s_at	early growth response 1	EGR1	3.86055	0.002	NM_001964
207655_s_at	B-cell linker	BLNK	-2.1	<0.001	NM_013314
215925_s_at	CD72 molecule	CD72	-2.08869	0.0154942	NM_001782
220330_s_at	SAM domain, SH3 domain and nuclear localization signals 1	SAMSN1	2.02996	0.0059394	NM_022136
216361_s_at	K(lysine) acetyltransferase 6A	KAT6A/MOZ	2.54178	0.0020171	AJ251844
202648_at	transcription factor 3	TCF3	2.0731	<0.001	NM_003200
201040_at	guanine nucleotide binding protein (G protein), alpha inhibiting activity polypeptide 2	GNAI2	2.31944	<0.001	NM_002070
217394_at	T cell receptor alpha variable 13-1	TRAV13-1	2.52769	0.001	AE000521
221006_s_at	sorting nexin family member 27	SNX27	2.00363	0.008	NM_030918
208364_at	inositol polyphosphate-4-phosphatase, type I, 107kDa	INPP4A	2.70034	<0.001	NM_001566
210439_at	inducible T-cell co-stimulator	ICOS	2.25502	0.00621964	AB023135
205285_s_at	FYN binding protein	FYB/ADAP	2.47309	<0.001	NM_001465
221331_x_at	cytotoxic T-lymphocyte-associated protein 4	CTLA4	2.12515	0.00254423	NM_005214
211085_s_at	serine/threonine kinase 4	STK4/MST1	2.13593	0.0045093	Z25430
205456_at	CD3e molecule, epsilon (CD3-TCR complex)	CD3E	2.11357	0.00437459	NM_000733
208602_x_at	CD6 molecule	CD6	2.46693	<0.001	NM_006725
208748_s_at	flotillin 1	FLOT1	2.31187	0.00152173	NM_005803
211299_s_at	flotillin 2	FLOT2	2.23615	<0.001	NM_004475
204924_at	toll-like receptor 2	TLR2	2	0.015	NM_003264
221060_s_at	toll-like receptor 4	TLR4	2.1	0.001	NM_003266
211302_s_at	phosphodiesterase 4B, cAMP-specific	PDE4B	3.17414	0.00353914	L20966
200695_at	protein phosphatase 2, regulatory subunit A, alpha	PPP2R1A/PP2A	2.05999	<0.001	NM_014225
218880_at	FOS-like antigen 2	FOSL2/FRA2	3.17102	0.00524457	NM_005253
202773_s_at	splicing factor, suppressor of white-apricot homolog	SFSWAP/SWAP	2.07905	<0.001	NM_004592
215339_at	natural killer-tumor recognition sequence	NKTR	2.15377	0.00116189	NM_005385
211242_x_at	killer cell immunoglobulin-like receptor, two domains, long cytoplasmic tail, 4	KIR2DL4	2	0.004	AF276292
216552_x_at	killer cell immunoglobulin-like receptor, two domains, short cytoplasmic tail, 4	KIR2DS4	2.08	0.002	NM_001281972
200613_at	adaptor-related protein complex 2, mu 1 subunit	AP2M1	2.16522	<0.001	NM_004068
215602_at	FYVE, RhoGEF and PH domain containing 2	FGD2	-2.1308	0.00205594	AK024456
205461_at	RAB35, member RAS oncogene family	RAB35	2.11133	<0.001	NM_006861
Toll like receptors signaling
205067_at	interleukin 1, beta	IL1B	6.31546	0.001	NM_000576
206676_at	carcinoembryonic antigen-related cell adhesion molecule 8	CEACAM8	5.07135	0.003	M33326
211027_s_at	inhibitor of kappa light polypeptide gene enhancer in B-cells, kinase beta	IKBKB/IKKb	2.33012	<0.001	AY663108
213281_at	jun proto-oncogene	JUN/AP1	4.50738	0.0110508	NM_002228
206035_at	v-rel reticuloendotheliosis viral oncogene homolog	REL/c-REL	2.56457	0.00451416	NM_002908
217738_at	nicotinamide phosphoribosyltransferase	NAMPT	2.64157	0.00788502	NM_005746
216450_x_at	heat shock protein 90kDa beta (Grp94), member 1	HSP90B1/GP96	3.24239	<0.001	NM_003299
208748_s_at	flotillin 1	FLOT1	2.31187	0.00152173	NM_005803
214370_at	S100 calcium binding protein A8	S100A8	3.85376	<0.001	NM_002964
211016_x_at	heat shock 70kDa protein 4	HSPA4	2.24731	<0.001	NM_002154
211622_s_at	ADP-ribosylation factor 3	ARF3	2.1214	<0.001	M33384
Inflammatory response
207113_s_at	tumor necrosis factor	TNF	2	0.008	NM_000594
211506_s_at	interleukin 8	IL8	10.4401	0.013	AF043337
207433_at	interleukin 10	IL10	2.15854	<0.001	NM_000572
205067_at	interleukin 1, beta	IL1B	6.31546	0.001	NM_000576
205403_at	interleukin 1 receptor, type II	IL1R2	2.28547	0.002	NM_004633
217489_s_at	interleukin 6 receptor	IL6R	2.03	0.011	S72848
209774_x_at	chemokine (C-X-C motif) ligand 2	CXCL2	5.74959	0.007	M57731
201939_at	polo-like kinase 2	PLK2	6.20499	0.012	NM_006622
204470_at	chemokine (C-X-C motif) ligand 1	CXCL1	4.64014	0.003	NM_001511
207850_at	chemokine (C-X-C motif) ligand 3	CXCL3	3.53205	0.015	NM_002090
210118_s_at	interleukin 1, alpha	IL1A	3.92789	0.001	M15329
203751_x_at	jun D proto-oncogene	JUND	3.38506	0.008	NM_005354
219434_at	triggering receptor expressed on myeloid cells 1	TREM1	2.35799	<0.001	NM_018643
209395_at	chitinase 3-like 1 (cartilage glycoprotein-39)	CHI3L1	2.28815	0.013	M80927
216598_s_at	chemokine (C-C motif) ligand 2	CCL2	2	0.002	S69738
205476_at	chemokine (C-C motif) ligand 20	CCL20	2.23289	0.011	NM_004591
205114_s_at	chemokine (C-C motif) ligand 3	CCL3	2.21442	0.007	NM_002983
210001_s_at	suppressor of cytokine signaling 1	SOCS1	2.15985	0.012	AB005043
212190_at	serpin peptidase inhibitor, clade E, member 2	SERPINE2	-2.13503	0.003	NM_006216
204351_at	S100 calcium binding protein P	S100P	2.08583	0.015	NM_005980
212099_at	ras homolog family member B	RHOB	2.08446	0.001	X06820
211919_s_at	chemokine (C-X-C motif) receptor 4	CXCR4	2.06212	0.008	AF348491
206025_s_at	tumor necrosis factor, alpha-induced protein 6	TNFAIP6	2.01096	0.013	NM_007115
207794_at	chemokine (C-C motif) receptor 2	CCR2	2.2	<0.001	NM_001123396
205099_s_at	chemokine (C-C motif) receptor 1	CCR1	2.14	0.002	NM_001295
207075_at	NLR family, pyrin domain containing 3	NLRP3	2.15	0.011	NM_004895
208782_at	follistatin-like 1	FSTL1	-2.1	0.007	BC000055
203591_s_at	colony stimulating factor 3 receptor (granulocyte)	CSF3R	1.89181	0.012	NM_000760
211434_s_at	chemokine (C-C motif) receptor-like 2	CCRL2	2	0.003	NM_003965
215485_s_at	intercellular adhesion molecule 1	ICAM1	2.04	0.015	NM_000201
200806_s_at	heat shock 60kDa protein 1 (chaperonin)	HSPD1	2.02	0.001	NM_002156
209722_s_at	serpin peptidase inhibitor, clade B (ovalbumin), member 9	SERPINB9	2.03336	0.00105679	NM_004155
209701_at	endoplasmic reticulum aminopeptidase 1	ERAP1	2.44027	<0.001	NM_016442
216243_s_at	interleukin 1 receptor antagonist	IL1RN	2.25743	0.008	NM_173842
202643_s_at	tumor necrosis factor, alpha-induced protein 3	TNFAIP3	2.15	0.012	NM_001270508
201044_x_at	dual specificity phosphatase 1	DUSP1	4.71045	0.0129729	NM_004417
213688_at	calmodulin 1 (phosphorylase kinase, delta)	CALM1	2.24084	0.00104633	NM_006888
211081_s_at	mitogen-activated protein kinase kinase kinase kinase 5	MAP4K5	2.12187	<0.001	Z25426
204896_s_at	prostaglandin E receptor 4 (subtype EP4)	PTGER4/EP4	2.66165	<0.001	NM_000958
210004_at	oxidized low density lipoprotein (lectin-like) receptor 1	OLR1/LOX1	4.12579	0.00156344	AF035776
217738_at	nicotinamide phosphoribosyltransferase	NAMPT	2.64157	0.00788502	NM_005746
214370_at	S100 calcium binding protein A8	S100A8	3.85376	<0.001	NM_002964
211016_x_at	heat shock 70kDa protein 4	HSPA4/HSP70	2.24731	<0.001	NM_002154
209785_s_at	phospholipase A2, group IVC (cytosolic, calcium-independent)	PLA2G4C	-2.1102	0.0128937	AF065214
216609_at	thioredoxin	TXN	2.42909	<0.001	AF065241
M97935_5_at	signal transducer and activator of transcription 1, 91kDa	STAT1	2.25763	0.000860969	GU211347
213281_at	jun proto-oncogene	JUN/AP1	4.50738	0.0110508	NM_002228
216450_x_at	heat shock protein 90kDa beta (Grp94), member 1	HSP90B1/GP96	3.24239	<0.001	NM_003299
201348_at	glutathione peroxidase 3 (plasma)	GPX3	2.20515	0.00175611	NM_002084
206035_at	v-rel reticuloendotheliosis viral oncogene homolog (avian)	REL/c-REL	2.56457	0.00451416	NM_002908
207001_x_at	TSC22 domain family, member 3	TSC22D3/GILZ	2.37524	0.0134932	NM_004089
209959_at	nuclear receptor subfamily 4, group A, member 3	NR4A3/NOR1	5.69379	<0.001	U12767
201668_x_at	myristoylated alanine-rich protein kinase C substrate	MARCKS	2.36448	0.00330496	NM_002356
210935_s_at	WD repeat domain 1	WDR1	2.68353	<0.001	NM_017491
217230_at	ezrin	EZR	2.68344	<0.001	AF199015
217370_x_at	fused in sarcoma	FUS	2.01039	<0.001	NM_004960
Vascular damage
Blood coagulation
204614_at	serpin peptidase inhibitor, clade B (ovalbumin), member 2	SERPINB2	3.95671	0.013	NM_002575
202833_s_at	serpin peptidase inhibitor, clade A , member 1	SERPINA1	2.25311	<0.001	NM_000295
207808_s_at	protein S alpha	PROS1	-2.15987	0.002	NM_000313
201110_s_at	thrombospondin 1	THBS1	5.07785	0.0011	NM_003246
204713_s_at	coagulation factor V (proaccelerin, labile factor)	F5	2.5299	0.0014796	NM_000130
203294_s_at	lectin, mannose-binding, 1	LMAN1	2.49839	<0.001	U09716
213258_at	tissue factor pathway inhibitor (lipoprotein-associated coagulation inhibitor)	TFPI	-2.52911	0.00113174	BF511231
203650_at	protein C receptor, endothelial	PROCR	-2.66613	0.00060145	NM_006404
Angiogenesis
211924_s_at	plasminogen activator, urokinase receptor	PLAUR/UPAR	3.42455	0.007	NM_002659
207329_at	matrix metallopeptidase 8 (neutrophil collagenase)	MMP8	2.41566	0.012	NM_002424
210512_s_at	vascular endothelial growth factor A	VEGFA	2.01051	0.003	AF022375
212291_at	homeodomain interacting protein kinase 1	HIPK1	2.63439	<0.001	NM_198268
209959_at	nuclear receptor subfamily 4, group A, member 3	NR4A3/NOR1	5.69379	<0.001	U12767
200634_at	profilin 1	PFN1	2.17992	<0.001	NM_005022
200727_s_at	ARP2 actin-related protein 2 homolog (yeast)	ACTR2	2.08024	<0.001	NM_001005386
208751_at	N-ethylmaleimide-sensitive factor attachment protein, alpha	NAPA	2.55879	0.000712783	XM_011527436
204909_at	DEAD (Asp-Glu-Ala-Asp) box helicase 6	DDX6	4.7766	0.000743927	NM_004397
217383_at	phosphoglycerate kinase 1	PGK1	3.45344	0.000691074	NM_000291
Vasculitis
203887_s_at	thrombomodulin	THBD	2	0.015	NM_000361
206157_at	pentraxin 3, long	PTX3	2.21898	0.001	NM_002852
218880_at	FOS-like antigen 2	FOSL2/FRA2	3.17102	0.00524457	NM_005253
203313_s_at	TGFB-induced factor homeobox 1	TGIF1/TGIF	2.09982	0.00453509	NM_003244
RNA processing
216855_s_at	heterogeneous nuclear ribonucleoprotein U (scaffold attachment factor A)	HNRNPU	2.20374	<0.001	NM_004501
213472_at	heterogeneous nuclear ribonucleoprotein H1 (H)	HNRNPH1	3.84904	<0.001	AI022387
210077_s_at	serine/arginine-rich splicing factor 5	SRSF5/SRP40	2.31425	0.00890126	U30884
220797_at	methyltransferase like 16	METTL16	2.80813	<0.001	NM_024086
DNA processing
208900_s_at	topoisomerase (DNA) I	TOP1	2.487	0.00655429	J03250
211022_s_at	alpha thalassemia/mental retardation syndrome X-linked	ATRX	2.98732	<0.001	AB102641
205727_at	telomerase-associated protein 1	TEP1	-2.23992	<0.001	NM_007110
213826_s_at	H3 histone, family 3A	H3F3A	2.15356	0.00152681	AK311905
Translation
213087_s_at	eukaryotic translation elongation factor 1 delta	EEF1D	3.85488	<0.001	BF690020
204909_at	DEAD (Asp-Glu-Ala-Asp) box helicase 6	DDX6	4.7766	0.000743927	NM_004397
214041_x_at	ribosomal protein L37a	RPL37A	3.06992	<0.001	NM_000998
212044_s_at	ribosomal protein L27a	RPL27A	2.96458	<0.001	NM_000990
214001_x_at	ribosomal protein S10	RPS10	2.37072	<0.001	NM_001203245
Miscellaneous
217294_s_at	enolase 1, (alpha)	ENO1	2.14101	<0.001	NM_001428
213998_s_at	DEAD (Asp-Glu-Ala-Asp) box helicase 17	DDX17	2.95365	0.00472469	NM_006386
214718_at	GATA zinc finger domain containing 1	GATAD1/ODAG	-2.04518	<0.001	NM_021167
217202_s_at	glutamate-ammonia ligase	GLUL	3.02969	0.00117463	U08626
213926_s_at	ArfGAP with FG repeats 1	AGFG1/RIP1	2.82149	0.00254836	NM_001135187
200917_s_at	signal recognition particle receptor (docking protein)	SRPR	2.82404	<0.001	NM_003139
209301_at	carbonic anhydrase II	CA2	-2.2816	0.00187269	M36532
214007_s_at	twinfilin actin-binding protein 1	TWF1	2.25018	0.000543363	NM_001242397
